# Supplementary material for: Single nuclei transcriptomics of muscle reveals intra-muscular cell dynamics linked to dystrophin loss and rescue
Source: PubMed Central journal article supplement (PMC9485160; doi:10.1038/s42003-022-03938-0), 2022-09-19
Supplement: 42003_2022_3938_MOESM2_ESM.pdf [file 42003_2022_3938_MOESM2_ESM.pdf]

## Description of Additional Supplementary Files

**File name:** Supplementary Data 1

**Description:** Differentially Expressed genes mdx vs mdx e23AON vs WT mouse data.

**File name:** Supplementary Data 2

**Description:** Seurat findallmarkers files for mouse data.

**File name:** Supplementary Data 3

**Description:** Genes and References.

**File name:** Supplementary Data 4

**Description:** M2MDSC\_vs\_MDSC differentially expressed genes .

**File name:** Supplementary Data 5

**Description:** MDSC vs. M1.M2 transitional differentially expressed genes.

**File name:** Supplementary Data 6

**Description:** FB POSTN1 vs. FB CCL11 differentially expressed genes.

**File name:** Supplementary Data 7

**Description:** numerical data Fig. 6a.

**File name:** Supplementary Data 8

**Description:** numerical data Fig. 7c.

**File name:** Supplementary Data 9

**Description:** Seurat findallmarkers files for human data.

**File name:** Supplementary Data 10

**Description:** Differentially expressed genes DMD vs control human data.
